# Supplementary material
Source: Springer Nature journal article supplement (https://www.springermedizin.de/resource/supplementary/12913_2008_947_MOESM2_ESM.pdf/9536522)
Supplement: MOESM2 [file 9536522]

Potentially relevant studies identified (n=4656)

Studies excluded unlikely to be relevant based on screening titles (n=2936); reasons

- no primary care use among migrant groups (n=2827)
- no adult population (n=40)
- no kwantitative study (n=36)
- no original peer reviewed paper (n=33)

Studies retrieved for more detailed evaluation in abstract (n=1720)

Studies excluded based on screening abstracts (n=1436) ; reasons

- no primary care use among migrant groups (n=1152)
- no adult population (n=11)
- no kwantitative study (n=87)
- no original, peer reviewed paper (n=111)
- no non-migrant reference group (75)

Potentially appropriate studies retrieved for further consideration (n=167)

Studies excluded based on screening full text (n=130); reasons

- no primary care use among migrant groups (n= 108)
- no original, peer reviewed paper (n=11)
- no non-migrant reference group (n=9)
- other reasons (n=2)

Studies included in analysis (n=37)
